# Supplementary material for: Integrating Anti-Influenza Virus Activity and Chemical Pattern Recognition to Explore the Quality Evaluation Method of Lonicerae Japonicae Flos
Source: MDPI journal article supplement (doi:10.3390/molecules27185789), 2022-09-07
Supplement: s1 [file s1]

# Integrating Anti-Influenza Virus Activity and Chemical Pattern Recognition to Explore the Quality Evaluation Method of Lonicerae Japonicae Flos

Xueqing Xie <sup>1,†</sup>, Lifei Gu <sup>2,3,†</sup>, Wanyi Xu <sup>2,3</sup>, Xiean Yu <sup>2,3</sup>, Guo Yin <sup>2,3</sup>, Jue Wang <sup>2,3</sup>, Yibao Jin <sup>2,3</sup>, Lijun Wang <sup>2,3</sup>, Bing Wang <sup>2,3,\*</sup> and Tiejie Wang <sup>2,3,\*</sup>

<sup>1</sup> School of Pharmacy, Shenyang Pharmaceutical University, Shenyang 110016, China

<sup>2</sup> NMPA Key Laboratory for Quality Research and Evaluation of Traditional Chinese Medicine, Shenzhen Institute for Drug Control, Shenzhen 518057, China

<sup>3</sup> Shenzhen Key Laboratory of Drug Quality Standard Research, Shenzhen Institute for Drug Control, Shenzhen 518057, China

\* Correspondence: wangbingszyj@163.com (B.W.); szyjwjtj@163.com (T.W.)

† These authors contributed equally to this work.

## Supplementary Tables

**Table S1.** Precision, repeatability and stability of 9 common peaks.

| Peak No. | Precision             |           |                       |           | Repeatability (RSD%, n=6) |           | Stability (RSD%, n=8) |           |
|----------|-----------------------|-----------|-----------------------|-----------|---------------------------|-----------|-----------------------|-----------|
|          | Intra-day (RSD%, n=6) |           | Inter-day (RSD%, n=3) |           | Retention time            | Peak area | Retention time        | Peak area |
|          | Retention time        | Peak area | Retention time        | Peak area |                           |           |                       |           |
| 4        | 0.10                  | 0.30      | 0.19                  | 1.95      | 0.09                      | 2.01      | 0.87                  | 2.10      |
| 15       | 0.05                  | 0.98      | 0.24                  | 0.96      | 0.12                      | 1.41      | 0.50                  | 1.38      |
| 18       | 0.07                  | 0.19      | 0.25                  | 0.62      | 0.09                      | 2.53      | 0.55                  | 2.08      |
| 19       | 0.09                  | 0.34      | 0.27                  | 0.82      | 0.09                      | 2.17      | 0.52                  | 0.24      |
| 23       | 0.02                  | 0.29      | 0.20                  | 0.58      | 0.11                      | 2.23      | 0.52                  | 0.41      |
| 25       | 0.01                  | 0.26      | 0.15                  | 0.03      | 0.06                      | 1.20      | 0.35                  | 0.65      |
| 37       | 0.02                  | 0.66      | 0.15                  | 0.69      | 0.04                      | 2.44      | 0.25                  | 0.68      |
| 39       | 0.02                  | 0.60      | 0.15                  | 0.65      | 0.04                      | 2.91      | 0.29                  | 1.27      |
| 41       | 0.02                  | 0.80      | 0.17                  | 1.07      | 0.04                      | 2.96      | 0.28                  | 0.82      |

**Table S2.** Similarity analysis results for 71 batches of Lonicerae japonicae flos samples compared with reference fingerprint.

| Sample No. | Similarity | Sample No. | Similarity | Sample No. | Similarity |
|------------|------------|------------|------------|------------|------------|
| S1         | 0.988      | S26        | 0.977      | S51        | 0.996      |
| S2         | 0.967      | S27        | 0.972      | S52        | 0.993      |
| S3         | 0.987      | S28        | 0.978      | S53        | 0.987      |
| S4         | 0.912      | S29        | 0.978      | S54        | 0.988      |
| S5         | 0.975      | S30        | 0.988      | S55        | 0.989      |
| S6         | 0.965      | S31        | 0.937      | S56        | 0.991      |
| S7         | 0.98       | S32        | 0.993      | S57        | 0.998      |

(continued on next page)

Table S2. (continued).

| Sample No. | Similarity | Sample No. | Similarity | Sample No. | Similarity |
|------------|------------|------------|------------|------------|------------|
| S8         | 0.994      | S33        | 0.993      | S58        | 0.997      |
| S9         | 0.997      | S34        | 0.956      | S59        | 0.997      |
| S10        | 0.994      | S35        | 0.986      | S60        | 0.998      |
| S11        | 0.997      | S36        | 0.977      | S61        | 0.996      |
| S12        | 0.986      | S37        | 0.979      | S62        | 0.399      |
| S13        | 0.995      | S38        | 0.982      | S63        | 0.521      |
| S14        | 0.993      | S39        | 0.924      | S64        | 0.543      |
| S15        | 0.968      | S40        | 0.965      | S65        | 0.516      |
| S16        | 0.987      | S41        | 0.989      | S66        | 0.626      |
| S17        | 0.987      | S42        | 0.983      | S67        | 0.907      |
| S18        | 0.985      | S43        | 0.996      | S68        | 0.692      |
| S19        | 0.984      | S44        | 0.998      | S69        | 0.795      |
| S20        | 0.921      | S45        | 0.998      | S70        | 0.876      |
| S21        | 0.987      | S46        | 0.997      | S71        | 0.427      |
| S22        | 0.964      | S47        | 0.998      |            |            |
| S23        | 0.970      | S48        | 0.999      |            |            |
| S24        | 0.978      | S49        | 0.902      |            |            |
| S25        | 0.974      | S50        | 0.996      |            |            |

Table S3. Identification of the 8 bioactive peaks.

| Peak No. | t <sub>R</sub> (min) | Formula                                          | Mode                                          | Measured mass | Calculated mass | Mass error (mDa) | MS fragmentation                                            | Identification               |
|----------|----------------------|--------------------------------------------------|-----------------------------------------------|---------------|-----------------|------------------|-------------------------------------------------------------|------------------------------|
| 4        | 11.633               | C <sub>16</sub> H <sub>18</sub> O <sub>9</sub>   | [M-H] <sup>-</sup>                            | 353.0869      | 353.0878        | -0.9             | 191.0542 179.0332<br>173.0436 161.0243<br>135.0435          | Neochlorogenic acid          |
| 13       | 15.003               | C <sub>22</sub> H <sub>33</sub> NO <sub>11</sub> | [M-H] <sup>-</sup>                            | 486.1949      | 486.1975        | -2.6             | 324.1421 292.1163<br>248.1266 178.0856<br>114.0549          | Unknown                      |
| 17       | 16.851               | C <sub>21</sub> H <sub>27</sub> NO <sub>12</sub> | [M-H] <sup>-</sup>                            | 484.1438      | 484.1460        | -2.2             | 440.1539 260.0919<br>208.0605 164.0705<br>128.0342          | Unknown                      |
| 18       | 17.512               | C <sub>16</sub> H <sub>18</sub> O <sub>9</sub>   | [M-H] <sup>-</sup>                            | 353.0869      | 353.0878        | -0.9             | 191.0542 179.0332<br>173.0436 161.0243<br>135.0435          | Chlorogenic acid             |
| 19       | 18.057               | C <sub>16</sub> H <sub>18</sub> O <sub>9</sub>   | [M-H] <sup>-</sup>                            | 353.0869      | 353.0878        | -0.9             | 191.0542 179.0332<br>173.0436 161.0243<br>135.0435          | Cryptochlorogenic acid       |
| 23       | 20.630               | C <sub>16</sub> H <sub>22</sub> O <sub>9</sub>   | [M-H] <sup>-</sup><br>[M-H+HCOO] <sup>-</sup> | 403.1232      | 403.1246        | -1.4             | 357.1197 195.0660<br>151.0771 125.0232                      | Sweroside                    |
| 25       | 23.779               | C <sub>17</sub> H <sub>24</sub> O <sub>11</sub>  | [M-H] <sup>-</sup>                            | 403.1249      | 403.1246        | 0.3              | 371.0934 223.0583<br>165.0535 121.0271                      | Secoxyloganin                |
| 41       | 33.564               | C <sub>25</sub> H <sub>24</sub> O <sub>12</sub>  | [M-H] <sup>-</sup>                            | 515.1178      | 515.1195        | -1.7             | 353.0841 191.0542<br>179.0324 173.0429<br>161.0240 135.0437 | 4,5-Di-O-caffeoylquinic acid |

**Table S4.** The contents of 6 bioactive compounds in 71 batches of *Lonicerae japonicae* flos samples.

| Sample No. | Content (mg/g) |        |       |       |       |       |
|------------|----------------|--------|-------|-------|-------|-------|
|            | P4             | P18    | P19   | P23   | P25   | P41   |
| S1         | 3.029          | 11.717 | 3.283 | 1.976 | 2.909 | 3.440 |
| S2         | 3.967          | 16.060 | 4.511 | 1.161 | 4.650 | 3.248 |
| S3         | 3.188          | 10.654 | 3.317 | 2.726 | 2.690 | 2.640 |
| S4         | 2.465          | 8.740  | 2.495 | 1.823 | 2.469 | 2.612 |
| S5         | 2.695          | 9.728  | 2.888 | 1.559 | 1.740 | 2.579 |
| S6         | 2.961          | 14.330 | 3.305 | 1.728 | 1.363 | 2.755 |
| S7         | 2.748          | 10.087 | 2.857 | 2.525 | 2.846 | 2.799 |
| S8         | 2.914          | 11.616 | 3.110 | 2.234 | 3.803 | 3.101 |
| S9         | 3.065          | 10.394 | 3.181 | 2.447 | 2.777 | 3.035 |
| S10        | 3.099          | 9.364  | 3.104 | 2.341 | 3.000 | 3.078 |
| S11        | 3.230          | 10.753 | 3.411 | 2.700 | 3.212 | 3.497 |
| S12        | 3.662          | 12.187 | 3.856 | 1.488 | 1.981 | 3.383 |
| S13        | 3.133          | 9.561  | 3.185 | 2.369 | 3.117 | 3.235 |
| S14        | 2.848          | 8.663  | 2.799 | 2.288 | 3.394 | 2.803 |
| S15        | 2.572          | 10.583 | 2.670 | 2.122 | 1.008 | 1.728 |
| S16        | 2.909          | 9.977  | 3.038 | 2.185 | 2.541 | 2.842 |
| S17        | 2.901          | 9.972  | 3.005 | 2.296 | 2.706 | 2.816 |
| S18        | 2.947          | 10.879 | 3.139 | 2.392 | 2.808 | 3.096 |
| S19        | 2.675          | 10.076 | 2.823 | 2.106 | 2.442 | 2.877 |
| S20        | 3.641          | 10.941 | 3.850 | 2.101 | 3.380 | 3.117 |
| S21        | 3.408          | 9.335  | 3.594 | 2.623 | 4.659 | 3.745 |
| S22        | 3.674          | 9.105  | 3.965 | 2.534 | 4.665 | 2.761 |
| S23        | 3.858          | 9.848  | 4.204 | 2.795 | 5.061 | 3.116 |
| S24        | 3.800          | 9.375  | 4.005 | 2.795 | 5.084 | 3.114 |
| S25        | 3.594          | 9.019  | 3.849 | 2.565 | 4.586 | 2.880 |
| S26        | 4.294          | 10.635 | 4.732 | 2.577 | 4.525 | 3.166 |
| S27        | 4.148          | 10.591 | 4.583 | 2.698 | 4.710 | 3.159 |
| S28        | 4.430          | 11.133 | 4.697 | 2.512 | 4.763 | 3.532 |
| S29        | 3.337          | 8.487  | 3.511 | 2.503 | 4.439 | 2.597 |
| S30        | 3.409          | 10.088 | 3.555 | 2.186 | 2.854 | 2.179 |
| S31        | 3.941          | 10.190 | 4.108 | 2.188 | 3.703 | 2.590 |
| S32        | 3.699          | 10.505 | 3.862 | 2.202 | 3.555 | 3.294 |
| S33        | 3.451          | 10.154 | 3.633 | 2.291 | 3.007 | 3.199 |
| S34        | 4.341          | 10.617 | 4.530 | 2.692 | 4.455 | 4.062 |
| S35        | 4.734          | 11.581 | 4.947 | 2.406 | 3.414 | 3.365 |
| S36        | 4.461          | 10.364 | 4.634 | 3.187 | 4.815 | 4.164 |
| S37        | 4.055          | 9.385  | 4.191 | 2.816 | 4.367 | 3.731 |

(continued on next page)

Table S4. (continued).

| Sample No. | Content (mg/g) |        |       |       |        |       |
|------------|----------------|--------|-------|-------|--------|-------|
|            | P4             | P18    | P19   | P23   | P25    | P41   |
| S38        | 4.253          | 9.927  | 4.498 | 2.955 | 4.533  | 3.879 |
| S39        | 4.933          | 12.247 | 5.496 | 3.226 | 5.481  | 4.026 |
| S40        | 4.450          | 12.690 | 4.901 | 2.772 | 4.570  | 3.687 |
| S41        | 4.351          | 11.906 | 4.784 | 2.928 | 4.585  | 3.742 |
| S42        | 3.143          | 9.676  | 3.125 | 1.888 | 1.957  | 1.997 |
| S43        | 3.265          | 10.696 | 3.472 | 2.372 | 3.492  | 2.740 |
| S44        | 3.148          | 10.706 | 3.362 | 2.770 | 3.531  | 3.324 |
| S45        | 3.334          | 10.960 | 3.573 | 2.918 | 3.497  | 3.530 |
| S46        | 3.157          | 10.664 | 3.364 | 2.973 | 3.263  | 3.292 |
| S47        | 3.277          | 11.155 | 3.514 | 2.981 | 3.811  | 3.527 |
| S48        | 3.328          | 11.170 | 3.569 | 2.812 | 3.642  | 3.307 |
| S49        | 3.506          | 10.119 | 3.646 | 2.006 | 3.165  | 2.227 |
| S50        | 3.544          | 10.458 | 3.728 | 2.296 | 3.588  | 3.269 |
| S51        | 3.190          | 9.989  | 3.411 | 2.249 | 3.451  | 3.000 |
| S52        | 3.321          | 9.113  | 3.413 | 2.234 | 3.773  | 3.002 |
| S53        | 3.255          | 9.862  | 3.414 | 1.856 | 3.271  | 2.433 |
| S54        | 3.763          | 10.119 | 3.941 | 2.327 | 3.961  | 3.482 |
| S55        | 3.595          | 9.658  | 3.729 | 2.275 | 3.994  | 3.217 |
| S56        | 3.863          | 10.852 | 4.145 | 2.166 | 3.827  | 3.113 |
| S57        | 3.358          | 11.716 | 3.629 | 2.917 | 4.198  | 3.518 |
| S58        | 3.136          | 9.770  | 3.338 | 2.672 | 3.344  | 3.043 |
| S59        | 3.138          | 10.413 | 3.369 | 2.888 | 3.618  | 3.266 |
| S60        | 3.250          | 11.327 | 3.500 | 2.769 | 3.358  | 3.453 |
| S61        | 2.914          | 9.652  | 3.026 | 2.738 | 3.467  | 2.848 |
| S62        | 2.360          | 5.736  | 2.282 | 0.328 | 43.008 | 2.125 |
| S63        | 4.762          | 10.138 | 5.188 | 0.602 | 45.791 | 4.253 |
| S64        | 4.779          | 10.395 | 5.219 | 0.431 | 42.486 | 4.310 |
| S65        | 4.095          | 9.953  | 4.448 | 0.284 | 36.869 | 3.857 |
| S66        | 3.621          | 9.233  | 3.825 | 0.315 | 28.397 | 4.011 |
| S67        | 3.543          | 9.053  | 3.625 | 0.993 | 9.914  | 3.163 |
| S68        | 4.527          | 10.089 | 4.928 | 0.607 | 25.326 | 3.994 |
| S69        | 3.459          | 8.811  | 3.473 | 0.792 | 15.497 | 2.980 |
| S70        | 3.709          | 9.680  | 3.790 | 0.916 | 12.487 | 3.454 |
| S71        | 1.010          | 1.660  | 0.604 | 0.468 | 11.357 | 0.835 |

Note: P4, Neochlorogenic acid; P18, Chlorogenic acid; P19, Cryptochlorogenic acid; P23, Sweroside; P25, Secoxyloganin; P41, 4,5-Di-*O*-caffeoylquinic acid.

**Table S5.** Linearity, limit of detection (LOD) and limit of quantification (LOQ) data of the 6 bioactive compounds.

| Peak No. | Regressive equation    | <i>r</i> | Linear range (mg/mL) | LOD (mg/mL) | LOQ (mg/mL) |
|----------|------------------------|----------|----------------------|-------------|-------------|
|          | $y = 145.16x - 1.6609$ | 0.9998   | 0.0075 - 1.9150      | 0.0023      | 0.0075      |
| 18       | $y = 169.73x + 0.6888$ | 1.0000   | 0.0096 - 2.9500      | 0.0029      | 0.0096      |
| 19       | $y = 150.14x + 0.3692$ | 1.0000   | 0.0102 - 1.7500      | 0.0031      | 0.0102      |
| 23       | $y = 142.48x + 0.2565$ | 1.0000   | 0.0068 - 0.9450      | 0.0020      | 0.0068      |
| 25       | $y = 126.80x - 0.0148$ | 1.0000   | 0.0091 - 1.2300      | 0.0028      | 0.0091      |
| 41       | $y = 191.44x - 2.6543$ | 0.9999   | 0.0157 - 1.3400      | 0.0047      | 0.0157      |

**Table S6.** Precision, stability and recovery results of the 6 bioactive compounds.

| Peak No. | Precision             |                       | Repeatability (RSD%, n=6) | Stability (RSD%, n=8) | Recovery (%) |      |
|----------|-----------------------|-----------------------|---------------------------|-----------------------|--------------|------|
|          | Intra-day (RSD%, n=6) | Inter-day (RSD%, n=3) |                           |                       | Mean         | RSD  |
| 4        | 0.73                  | 0.43                  | 2.15                      | 0.39                  | 102.91       | 1.78 |
| 18       | 0.63                  | 0.14                  | 2.95                      | 0.86                  | 103.79       | 1.89 |
| 19       | 0.21                  | 0.97                  | 1.69                      | 2.02                  | 106.12       | 2.34 |
| 23       | 1.01                  | 0.58                  | 2.23                      | 1.15                  | 104.54       | 2.85 |
| 25       | 0.47                  | 0.69                  | 1.58                      | 1.03                  | 98.91        | 2.24 |
| 41       | 0.36                  | 0.72                  | 2.30                      | 1.18                  | 102.47       | 2.90 |

## Supplementary Figures

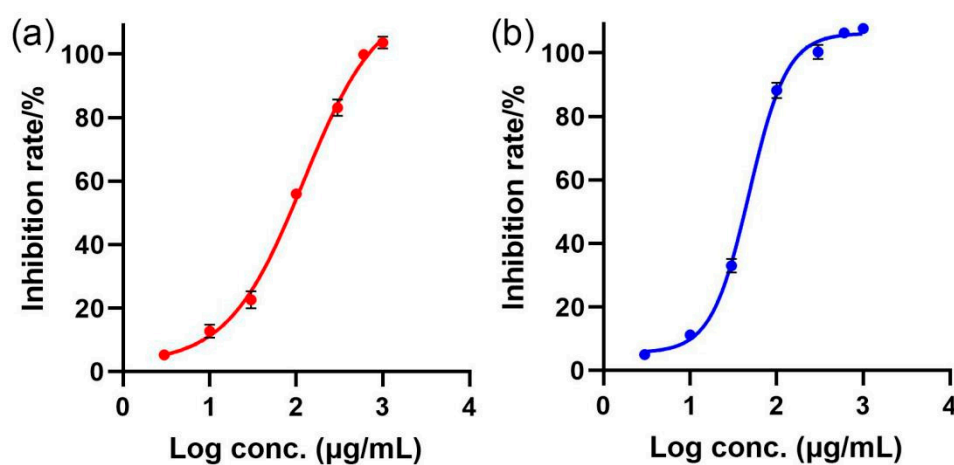**Figure S1.** The IC<sub>50</sub> of NA inhibitory activity of cultivated *Lonicerae japonicae* flos (a) and wild *Lonicerae japonicae* flos (b).

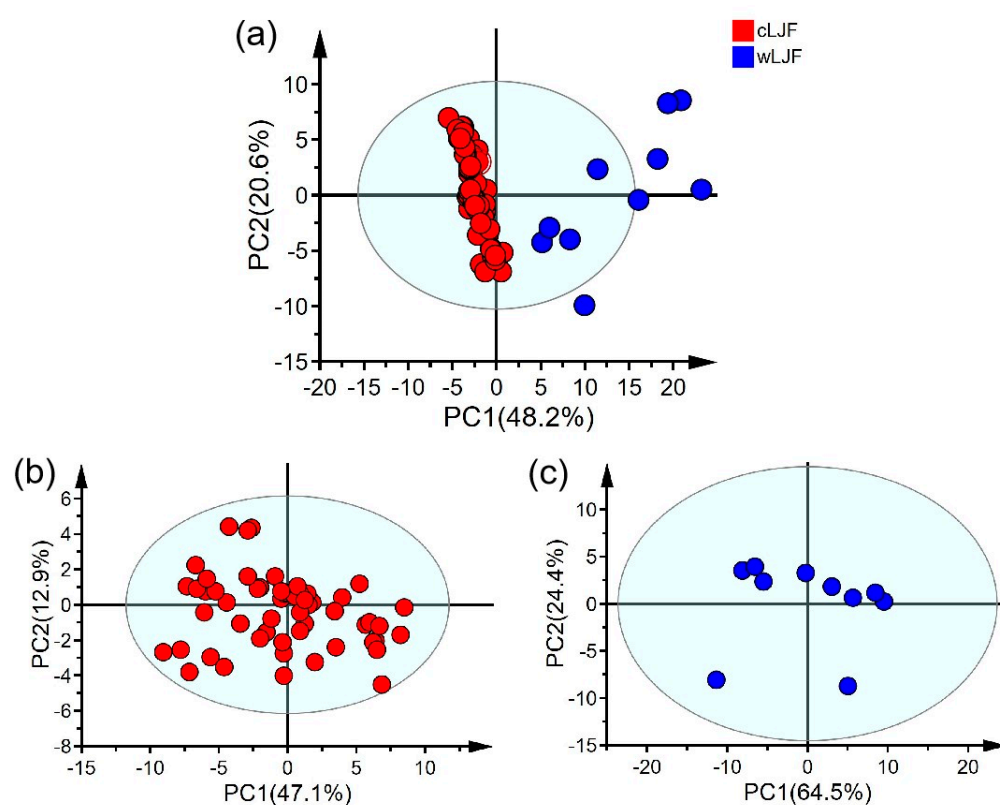

**Figure S2.** Outlier detection by PCA with 95% confidence. (a) PCA scores plots of 71 batches of Lonicerae japonicae flos. (b) PCA scores plots of 61 batches of cultivated Lonicerae japonicae flos (cLJF). (c) PCA scores plots of 10 batches of wild Lonicerae japonicae flos (wLJF).

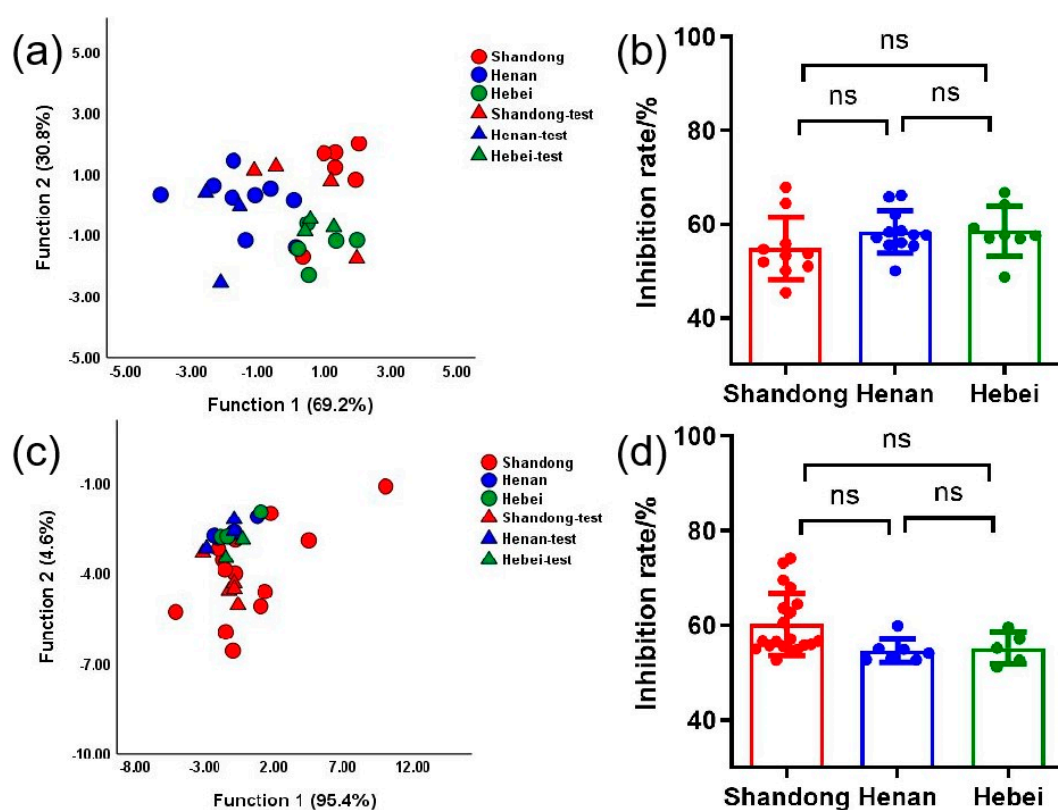

**Figure S3.** The NA inhibitory activity of *Lonicerae japonicae* flos samples. (a) LDA scores plots of cultivated *Lonicerae japonicae* flos samples from Shandong, Henan and Hebei processed by hot-air drying based on 6 bioactive peaks. (b) The NA inhibition rates of cultivated *Lonicerae japonicae* flos samples from Shandong, Henan and Hebei processed by hot-air drying. (c) LDA scores plots of cultivated *Lonicerae japonicae* flos samples from Shandong, Henan and Hebei processed by sun drying based on 6 bioactive peaks. (d) The NA inhibition rates of cultivated *Lonicerae japonicae* flos samples from Shandong, Henan and Hebei processed by sun drying. ("ns" means "not significant",  $P > 0.05$ , compared with each other.).

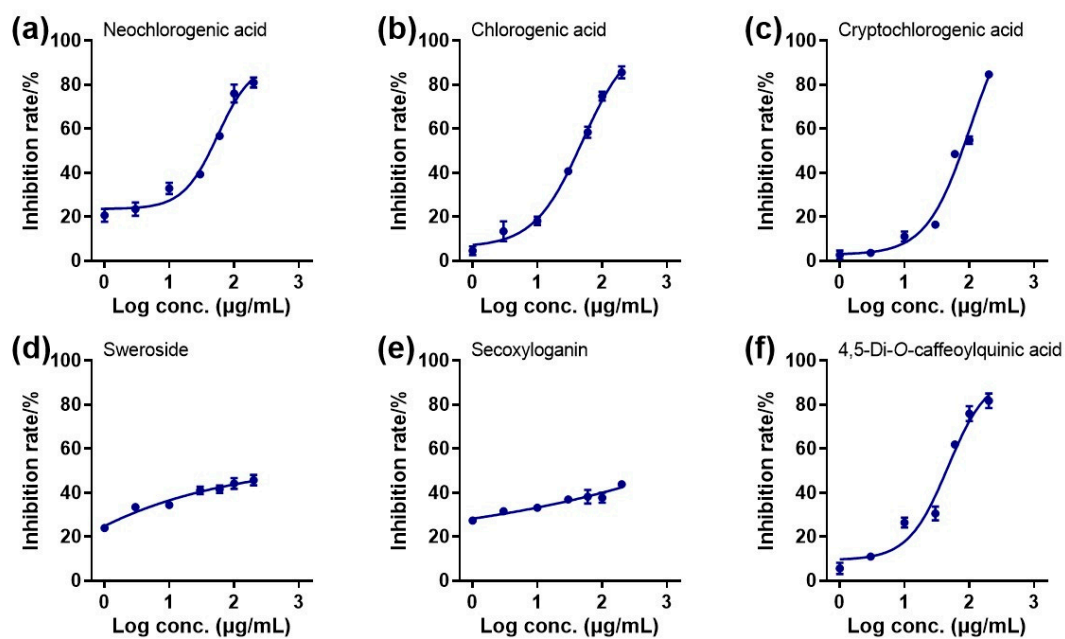

**Figure S4.** The  $\text{IC}_{50}$  of NA inhibitory activity of bioactive compounds. Neochlorogenic acid (a), chlorogenic acid (b), cryptochlorogenic acid (c), sweroside (d), secoxyloganin (e) and 4,5-Di-O-caffeoylquinic acid (f).
